# Supplementary material for: Intergeneric Relationships within the Family Salicaceae s.l. Based on Plastid Phylogenomics
Source: MDPI journal article supplement (doi:10.3390/ijms20153788), 2019-08-02
Supplement: s1 [file s1]

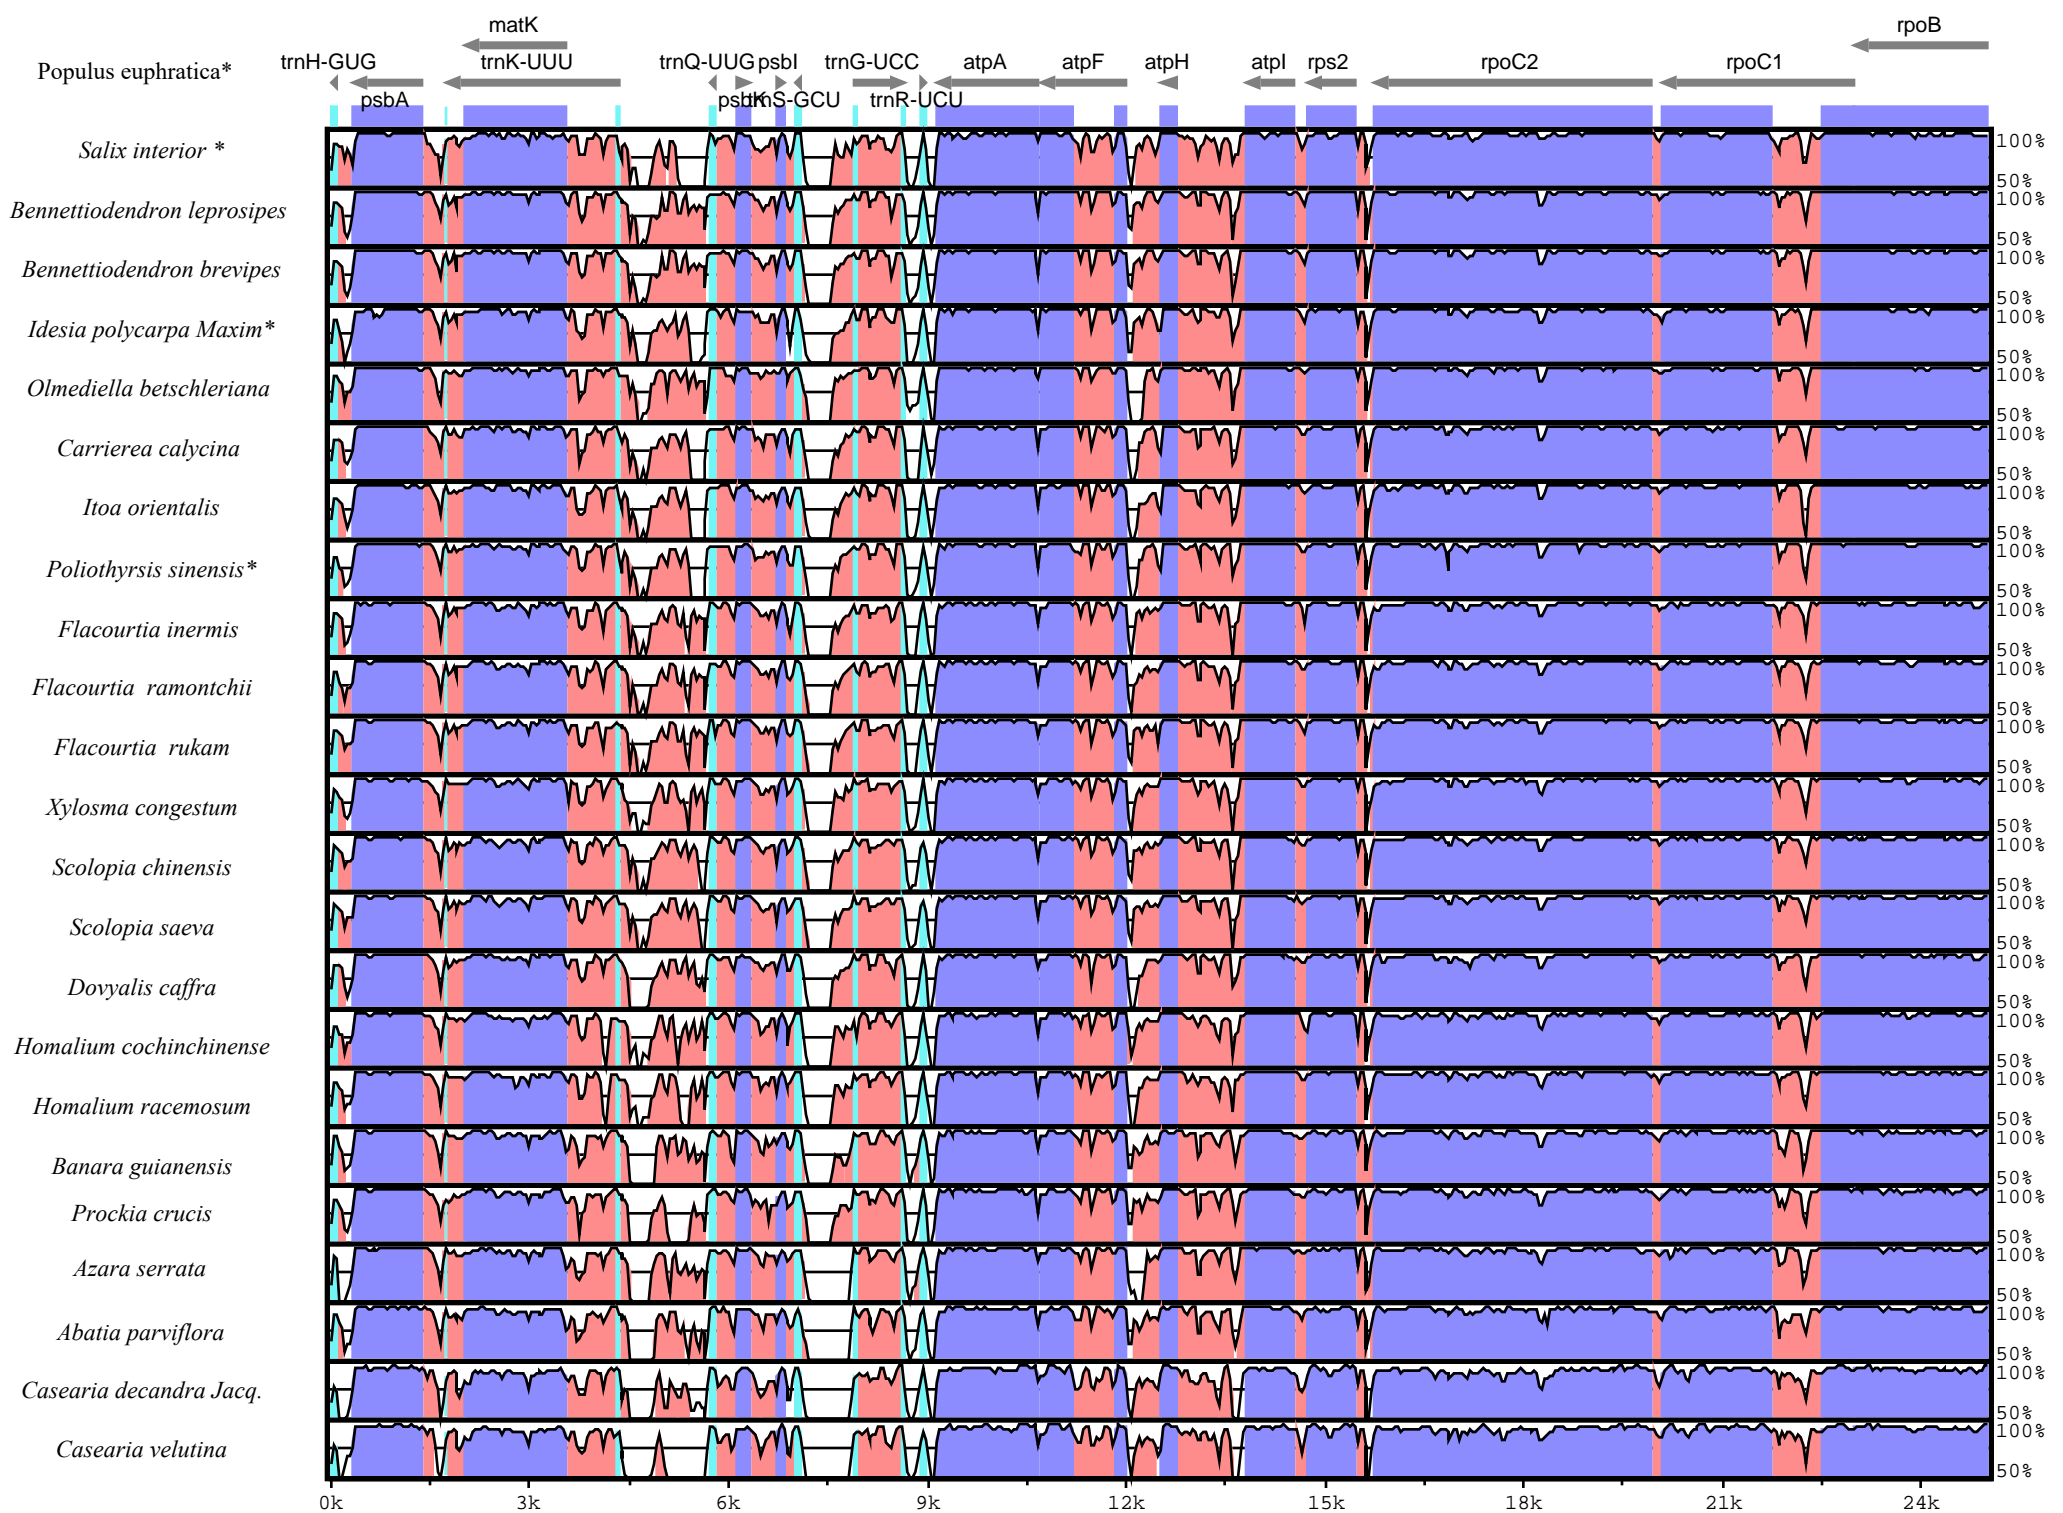

→ gene  
exon  
UTR  
CNS  
mRNA

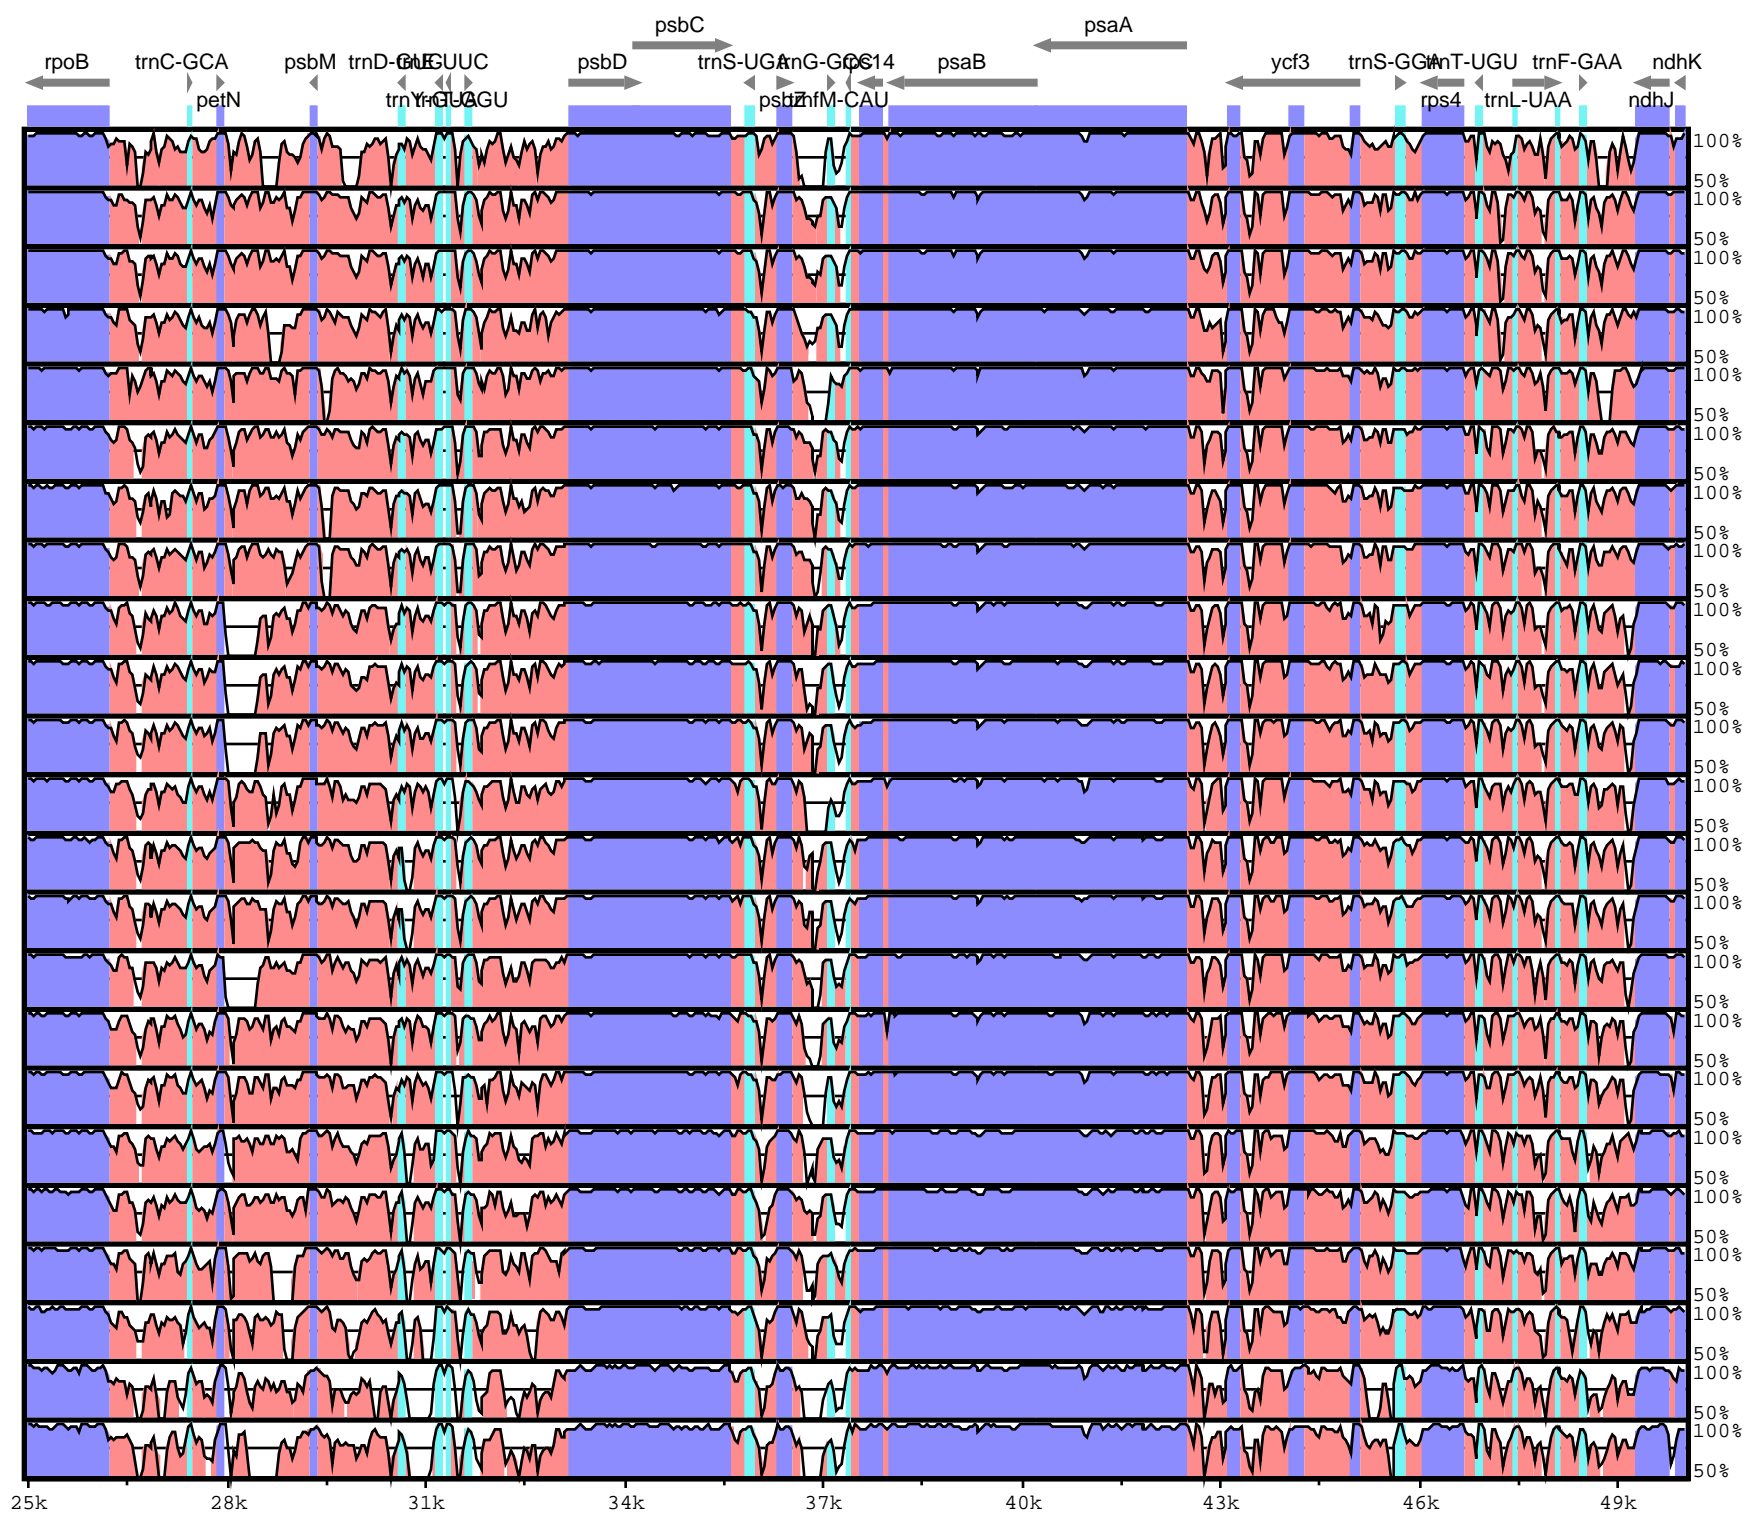

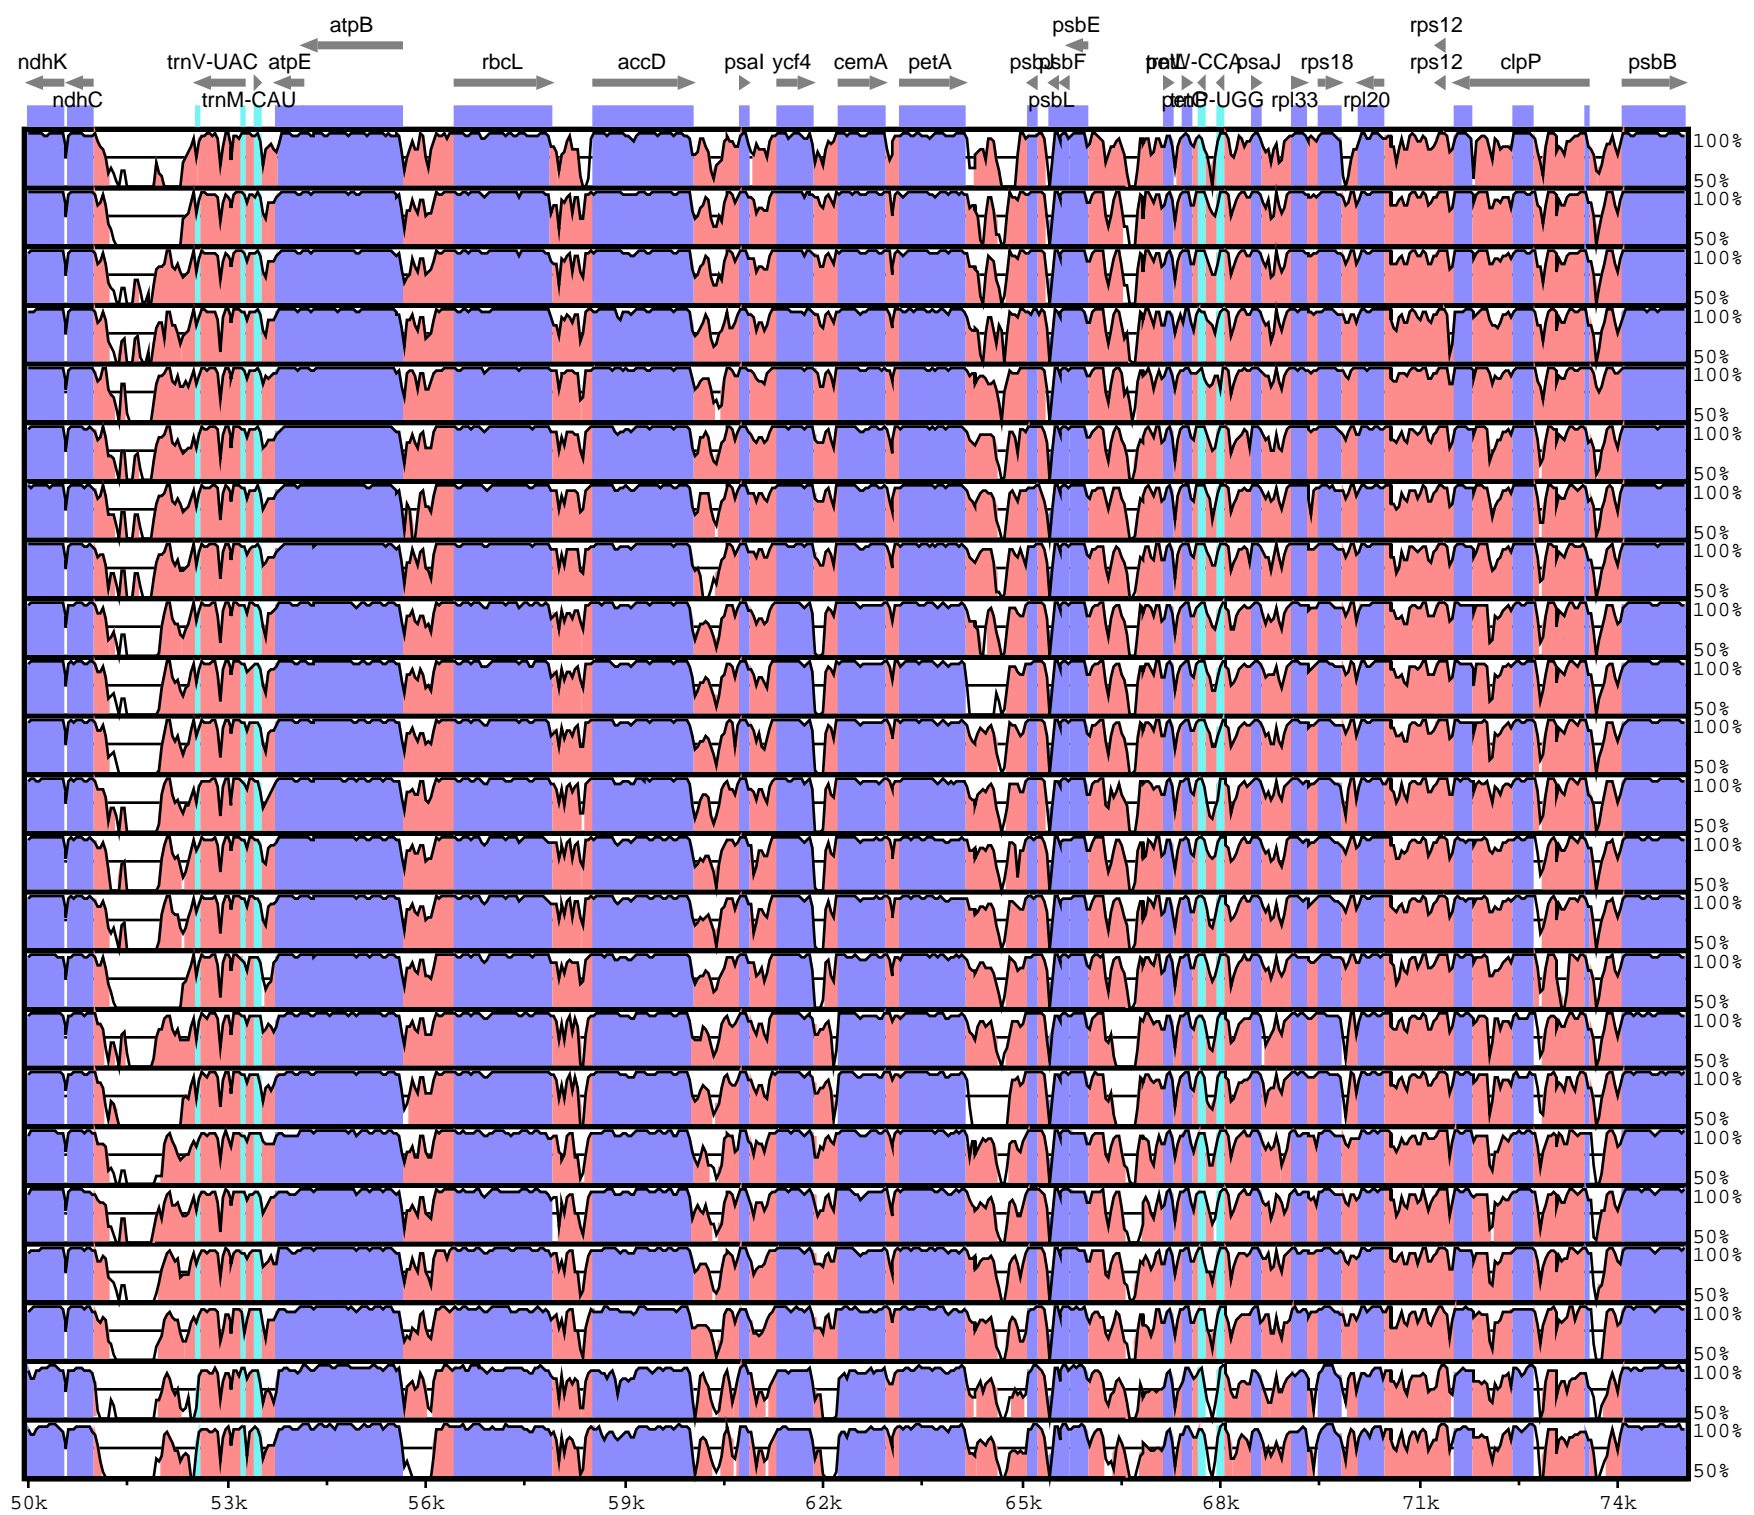

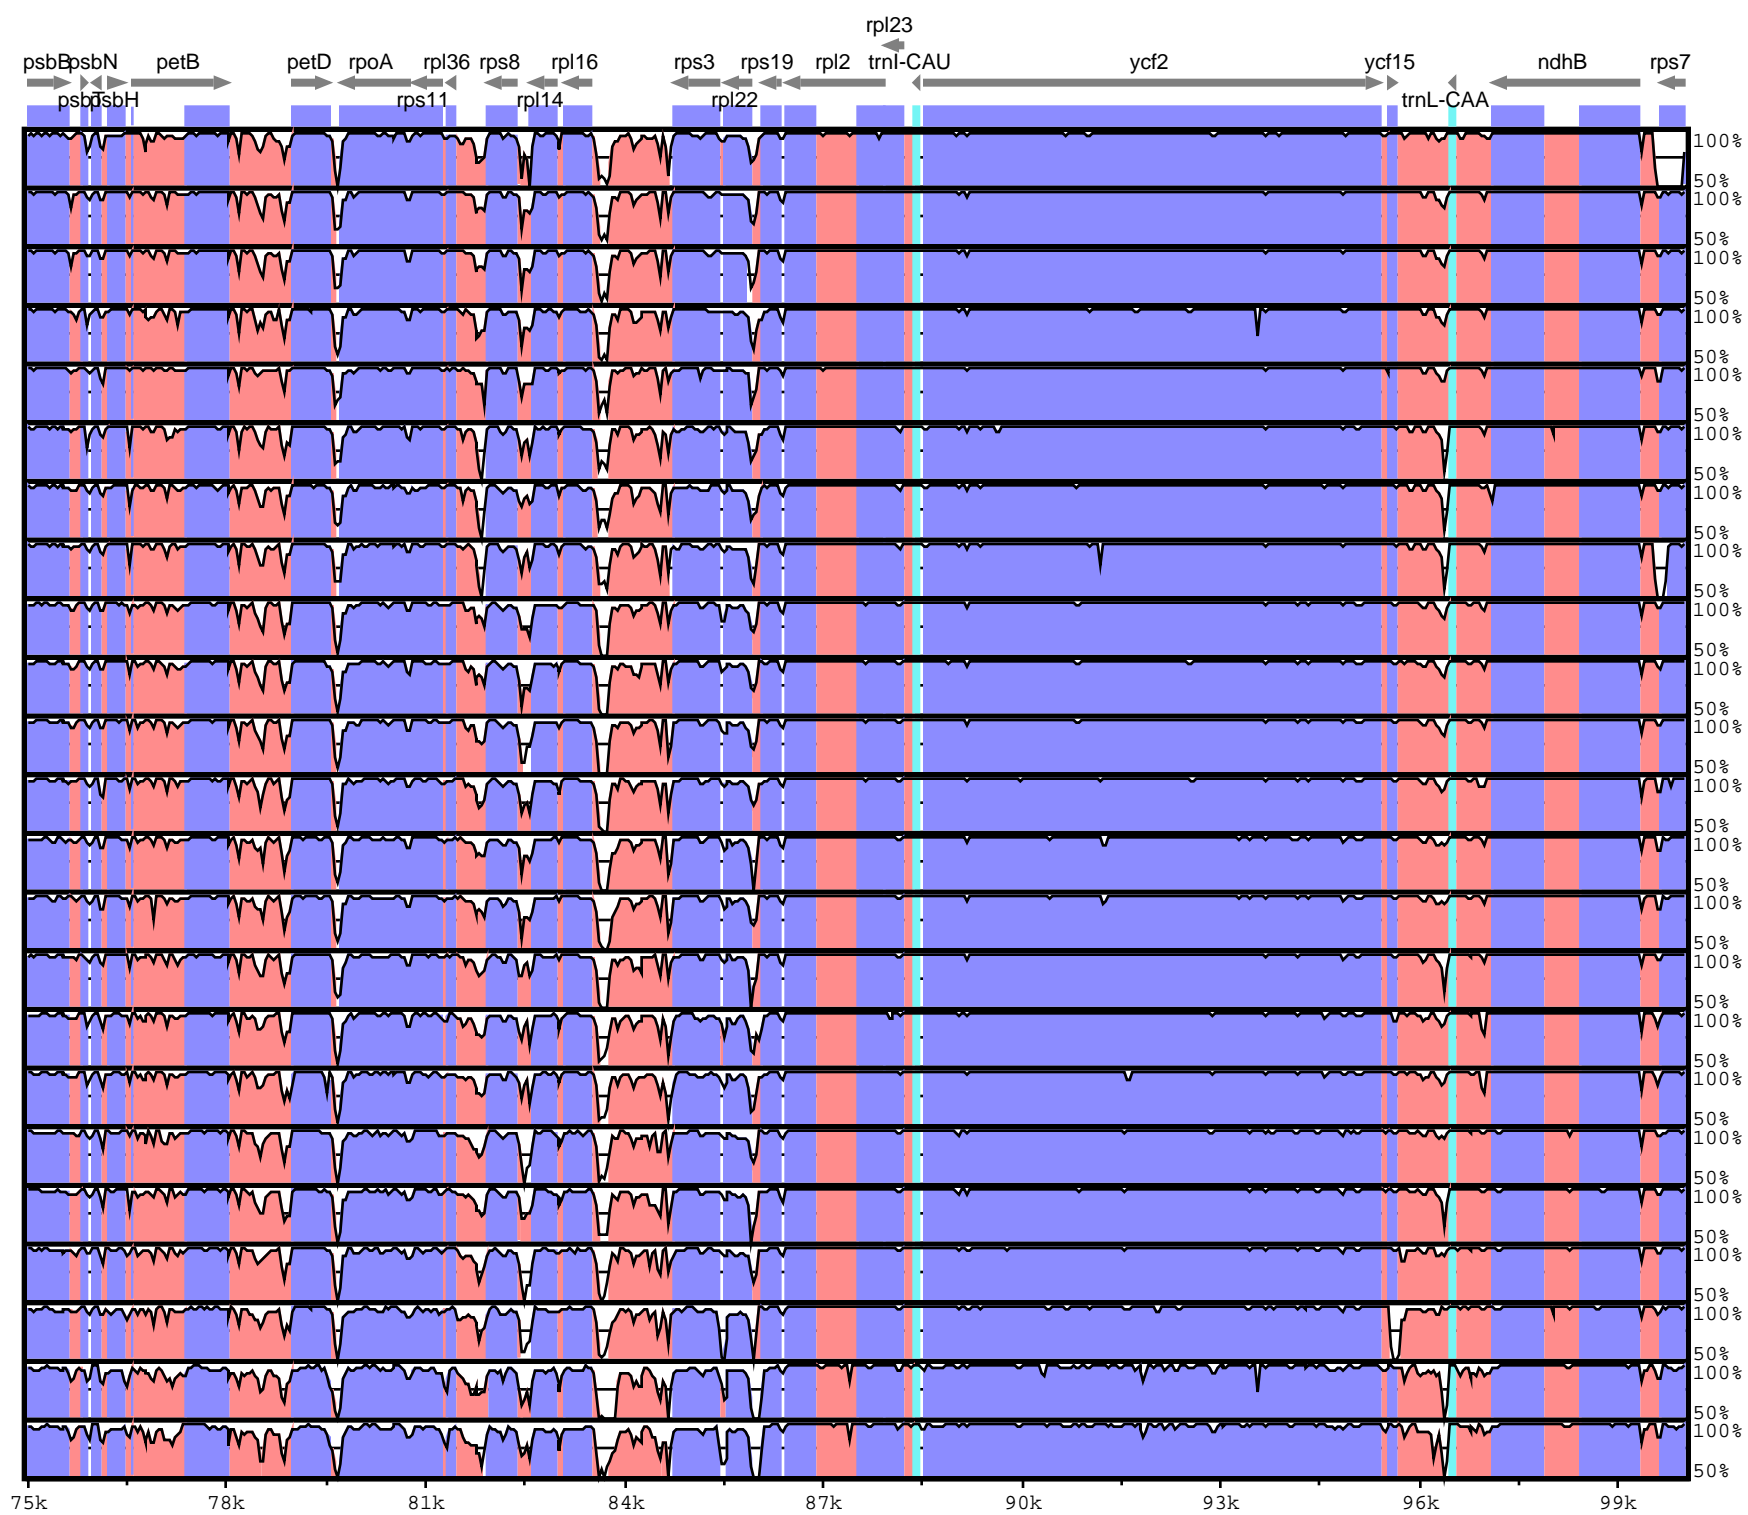

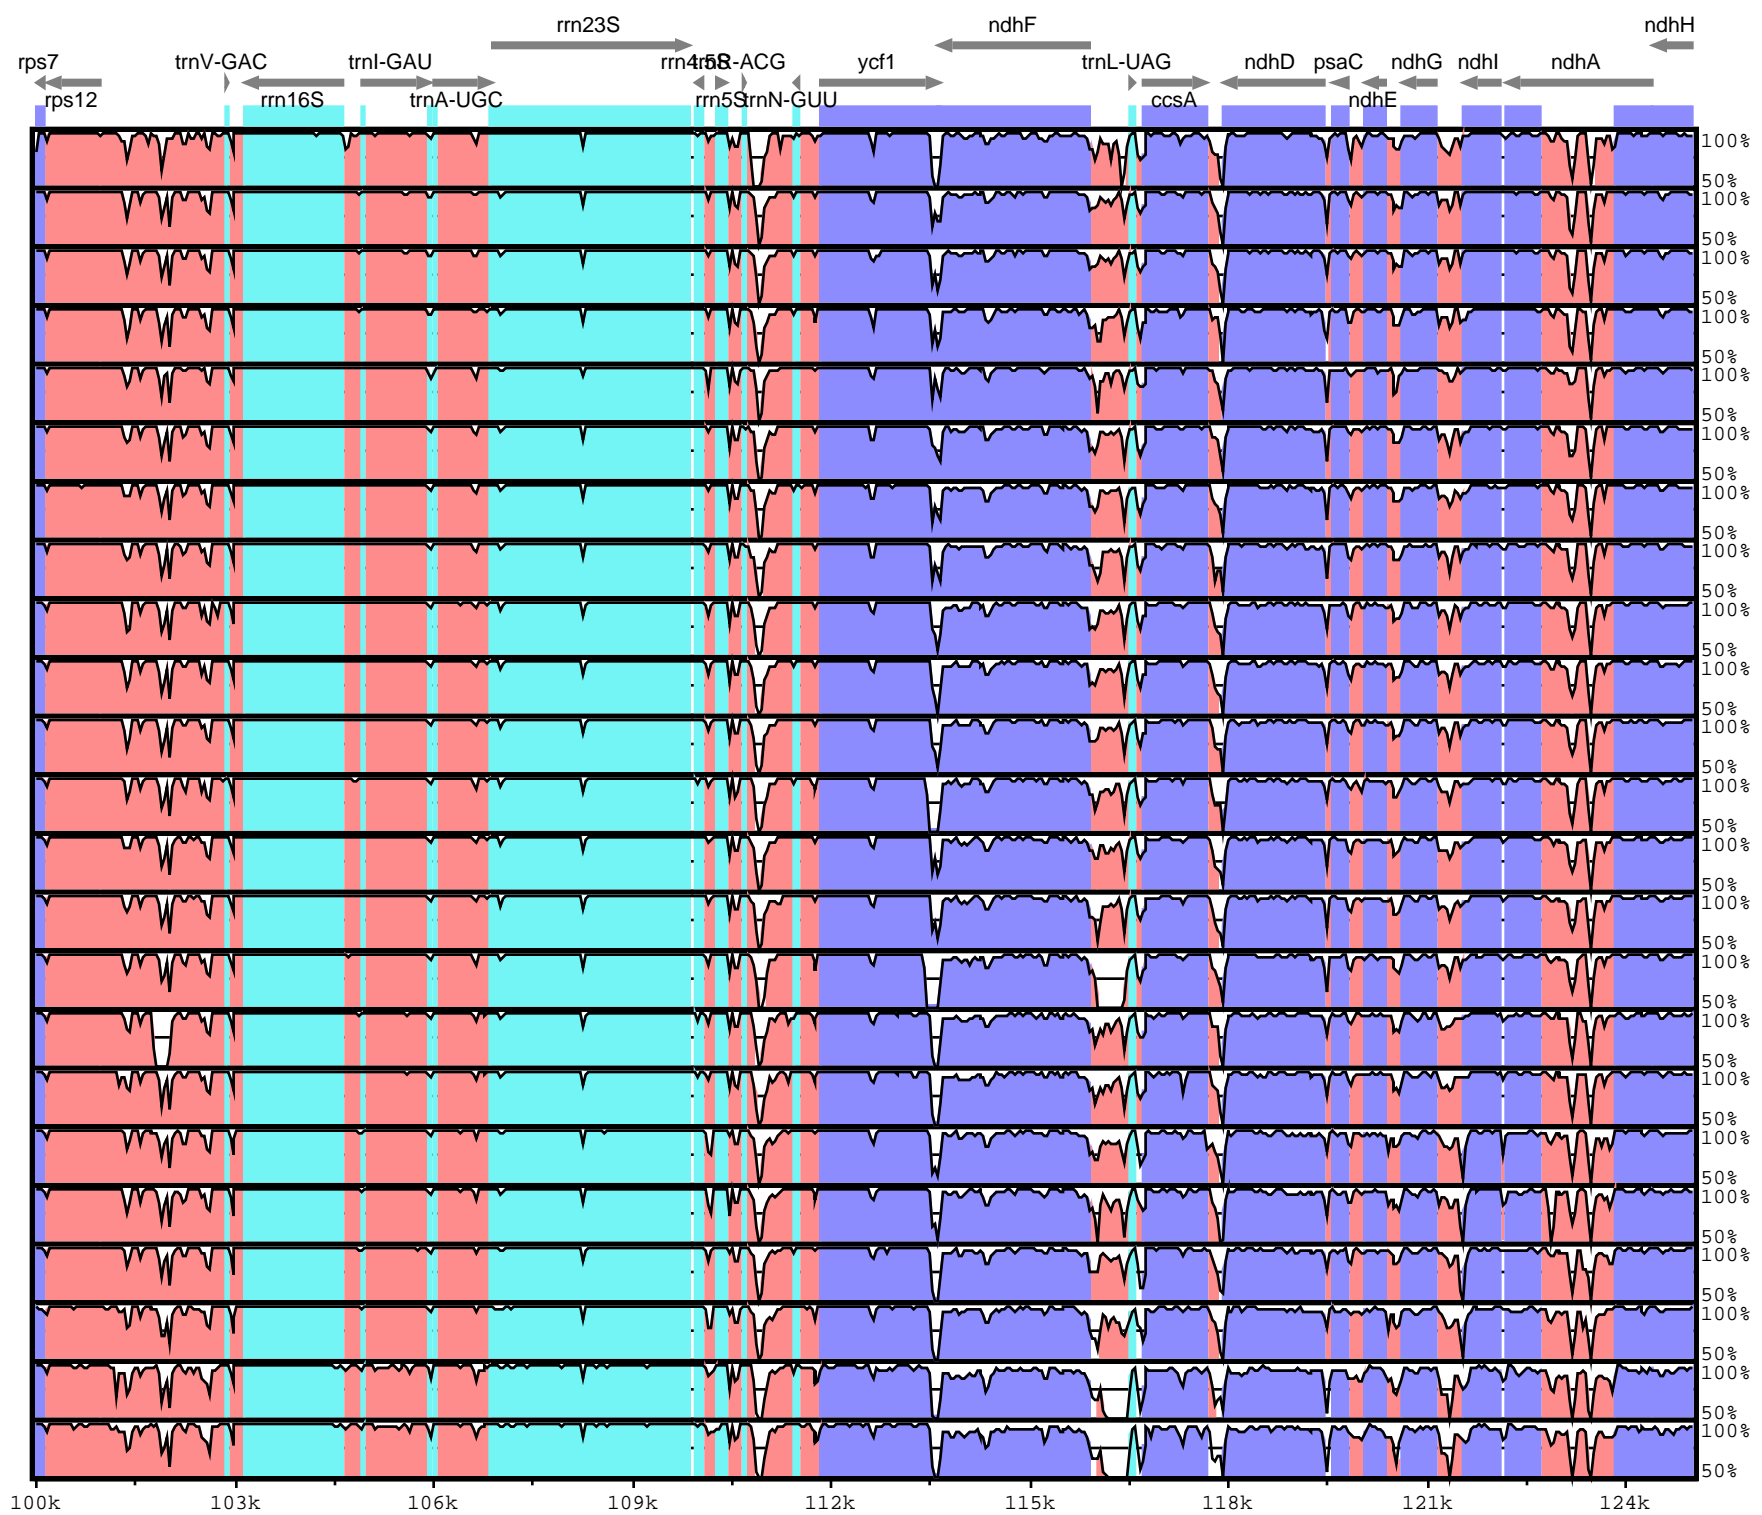

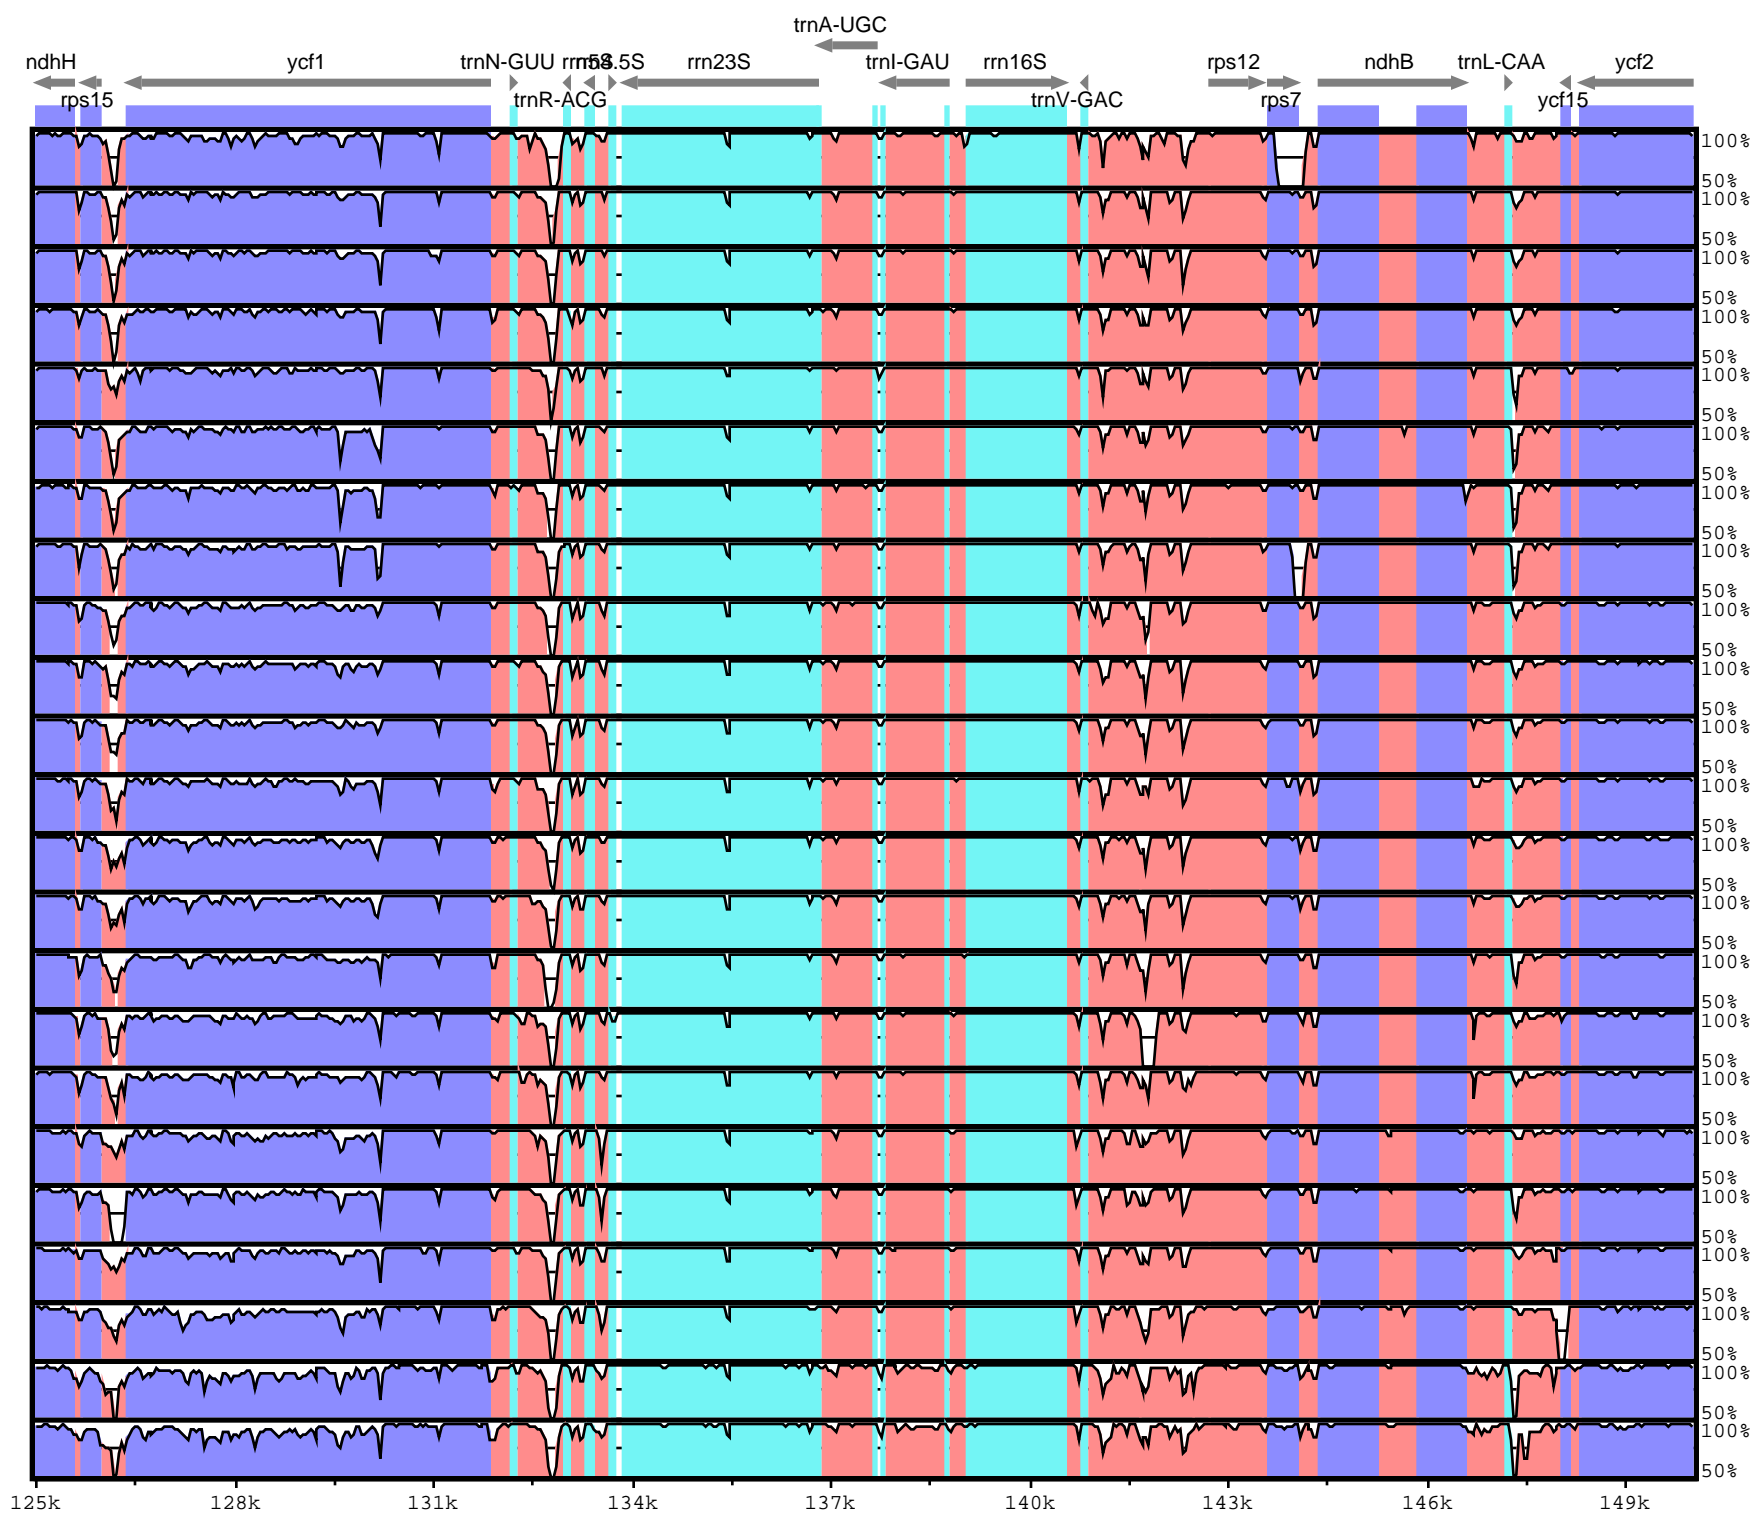

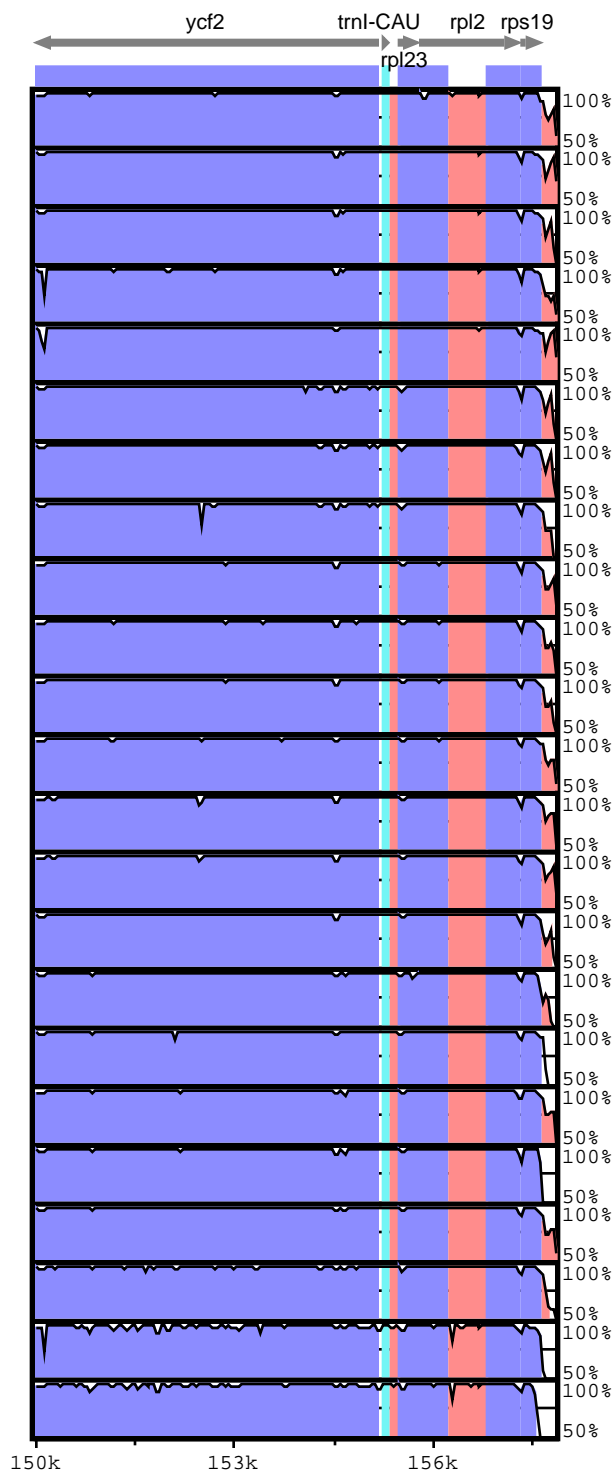

Figure S1. Sequence alignment of plastid genomes from twenty-four Salicaceae *s.l.* species. Sequences of plastid genomes were aligned and compared using the mVISTA program. The horizontal axis(x) indicates the coordinates within the plastid genome. The vertical scale (y axis) indicates the percentage identity, ranging from 50 to 100%. The grey arrows indicates the direction of each gene. Purple bars represent exons, orange bars show conserved non-coding sequences.
